# Supplementary material for: Discovery and Characterization of Differentially Expressed Soybean MiRNAs and Their Targets During Soybean Mosaic Virus Infection Unveils Novel Insight Into Soybean-SMV Interaction
Source: Research Square preprint supplement (doi:10.21203/rs.3.rs-775142/v1), 2021-09-23
Supplement: Supplementary file 1 [file a25c1df1cbf31d49ffbe6512.pdf]

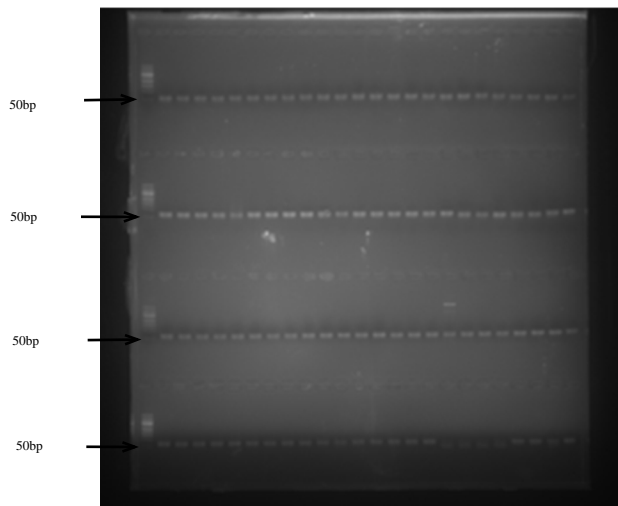

**Figure S6** The full-length gels and blots of RT-PCR detection of the 4 selected miRNAs.

The 4 rows showed miR49 (novel), miR70 (novel), miR1507a(known) and miR390d(known),respectively.

The 24 channels in each row represented 4 replicates and each replicate had 6 samples, the first three were leaves after SC3 inoculation in resistant line at 0dpi, 7dpi and 14dpi,and the last three were from susceptible line at corresponding time points.The selected Marker was 50 bp DNA ladder and the target band was about 65 bp.
