# Supplementary material for: Discovery and Characterization of Differentially Expressed Soybean MiRNAs and Their Targets During Soybean Mosaic Virus Infection Unveils Novel Insight Into Soybean-SMV Interaction
Source: Research Square preprint supplement (doi:10.21203/rs.3.rs-775142/v1), 2021-09-23
Supplement: Supplementary file 2 [file 70f205d47d4db4c47ada4dcf.xlsx]

## Sheet: Sheet1
Table S3 Statistical details of miRNA target gene prediction results for different samples
Samples or types	All miRNA	miRNA with Target	Target gene
R-0-1	694	634	13350
R-0-2	649	591	13930
R-0-3	672	616	13169
R-14-1	731	668	14693
R-14-2	702	642	14242
R-14-3	676	619	14091
R-7-1	738	678	15486
R-7-2	645	588	13561
R-7-3	712	649	13841
S-0-1	667	610	13351
S-0-2	758	697	15615
S-0-3	727	665	15370
S-14-1	1012	945	19541
S-14-2	1025	956	20146
S-14-3	999	939	20014
S-7-1	963	899	19538
S-7-2	984	916	19839
S-7-3	987	922	19698
Note:
Samples or types:All the leaves samples or the known miRNA and novel miRNA
All miRNA: total miRNA
miRNA with Target:The number of miRNAs predicted to target genes
Target gene:The number of predicted target genes
