# Supplementary material for: Discovery and Characterization of Differentially Expressed Soybean MiRNAs and Their Targets During Soybean Mosaic Virus Infection Unveils Novel Insight Into Soybean-SMV Interaction
Source: Research Square preprint supplement (doi:10.21203/rs.3.rs-775142/v1), 2021-09-23
Supplement: Supplementary file 5 [file ec1f2c5ca30b2084f72e8c88.xlsx]

## Sheet: Sheet1
Table S4 Statistical details of annotated differentially expressed miRNA target genes
DEG Set	Total	COG	GO	KEGG	KOG	NR	Pfam	Swiss-Prot	eggNOG
R-0-1_R-0-2_R-0-3_vs_R-7-1_R-7-2_R-7-3	728	263	343	263	386	726	651	535	664
R-7-1_R-7-2_R-7-3_vs_R-14-1_R-14-2_R-14-3	553	219	297	246	297	553	474	436	497
R-0-1_R-0-2_R-0-3_vs_R-14-1_R-14-2_R-14-3	386	145	171	128	220	386	349	315	356
S-0-1_S-0-2_S-0-3_vs_S-7-1_S-7-2_S-7-3	13513	5301	6752	5019	7449	13511	11603	10202	12142
S-7-1_S-7-2_S-7-3_vs_S-14-1_S-14-2_S-14-3	1674	670	872	613	928	1674	1477	1285	1515
S-0-1_S-0-2_S-0-3_vs_S-14-1_S-14-2_S-14-3	15522	6058	7753	5707	8540	15520	13286	11700	13876
S-0-1_S-0-2_S-0-3_vs_R-0-1_R-0-2_R-0-3	373	160	206	160	196	373	324	290	333
S-7-1_S-7-2_S-7-3_vs_R-7-1_R-7-2_R-7-3	11666	4586	5827	4241	6435	11666	10015	8839	10465
S-14-1_S-14-2_S-14-3_vs_R-14-1_R-14-2_R-14-3	14722	5743	7361	5365	8121	14722	12607	11084	13195
Note:
The first column represents the sample combination, the second to last column represents the number of annotations in each functional database
