# Supplementary material for: Discovery and Characterization of Differentially Expressed Soybean MiRNAs and Their Targets During Soybean Mosaic Virus Infection Unveils Novel Insight Into Soybean-SMV Interaction
Source: Research Square preprint supplement (doi:10.21203/rs.3.rs-775142/v1), 2021-09-23
Supplement: Supplementary file 6 [file 5efb187f5a2d466a1160bf29.xlsx]

## Sheet: Sheet1
Table S5 List of primers used for RT-PCR and qRT-PCR analyses
qPCR-Tubulin-F	GGAGTTCACAGAGGCAGAG
qPCR-Tubulin-R	CACTTACGCATCACATAGCA
qPCR-CP-F	GTGGGACAGGAGCAAAGA
qPCR-CP-R	TAAAGCGACCCGAAATGA
Gma-novel-miR49-Stem-loop primer	GTCGTATCCAGTGCAGGGTCCGAGGTATTCGCACTGGATACGACCACAAATT
Gma-novel-miR70-Stem-loop primer	GTCGTATCCAGTGCAGGGTCCGAGGTATTCGCACTGGATACGACCAGAGGCG
Gma-miR1507a-Stem-loop primer	GTCGTATCCAGTGCAGGGTCCGAGGTATTCGCACTGGATACGACTCAGACGA
Gma-miR390d-Stem-loop primer	GTCGTATCCAGTGCAGGGTCCGAGGTATTCGCACTGGATACGACGGTGCTAT
U6-Stem-loop primer	GTCGTATCCAGTGCAGGGTCCGAGGTATTCGCACTGGATACGACAAAATTTG
qPCR-Gma-novel-miR49-F	GCGGCGGGAGATTGGAGCAATC
qPCR-Gma-novel-miR70-F	GCGGCGGTGCGAGTGTCTTCGC
qPCR-Gma-miR1507a-F	GCGGCGGTCTCATTCCATACAT
qPCR-Gma-miR390d-F	GCGGCGGAAGCTCAGGAGGGAT
qPCR-U6-F	GCGGCGGGTCCCTTCGGGGACA
qPCR-Gma-miRNA-common-R	CAGTGCAGGGTCCGAGGTAT
