# Supplementary material for: Discovery and Characterization of Differentially Expressed Soybean MiRNAs and Their Targets During Soybean Mosaic Virus Infection Unveils Novel Insight Into Soybean-SMV Interaction
Source: Research Square preprint supplement (doi:10.21203/rs.3.rs-775142/v1), 2021-09-23
Supplement: Supplementary file [file 6deb7b2bd3895a967b3533ff.pdf]

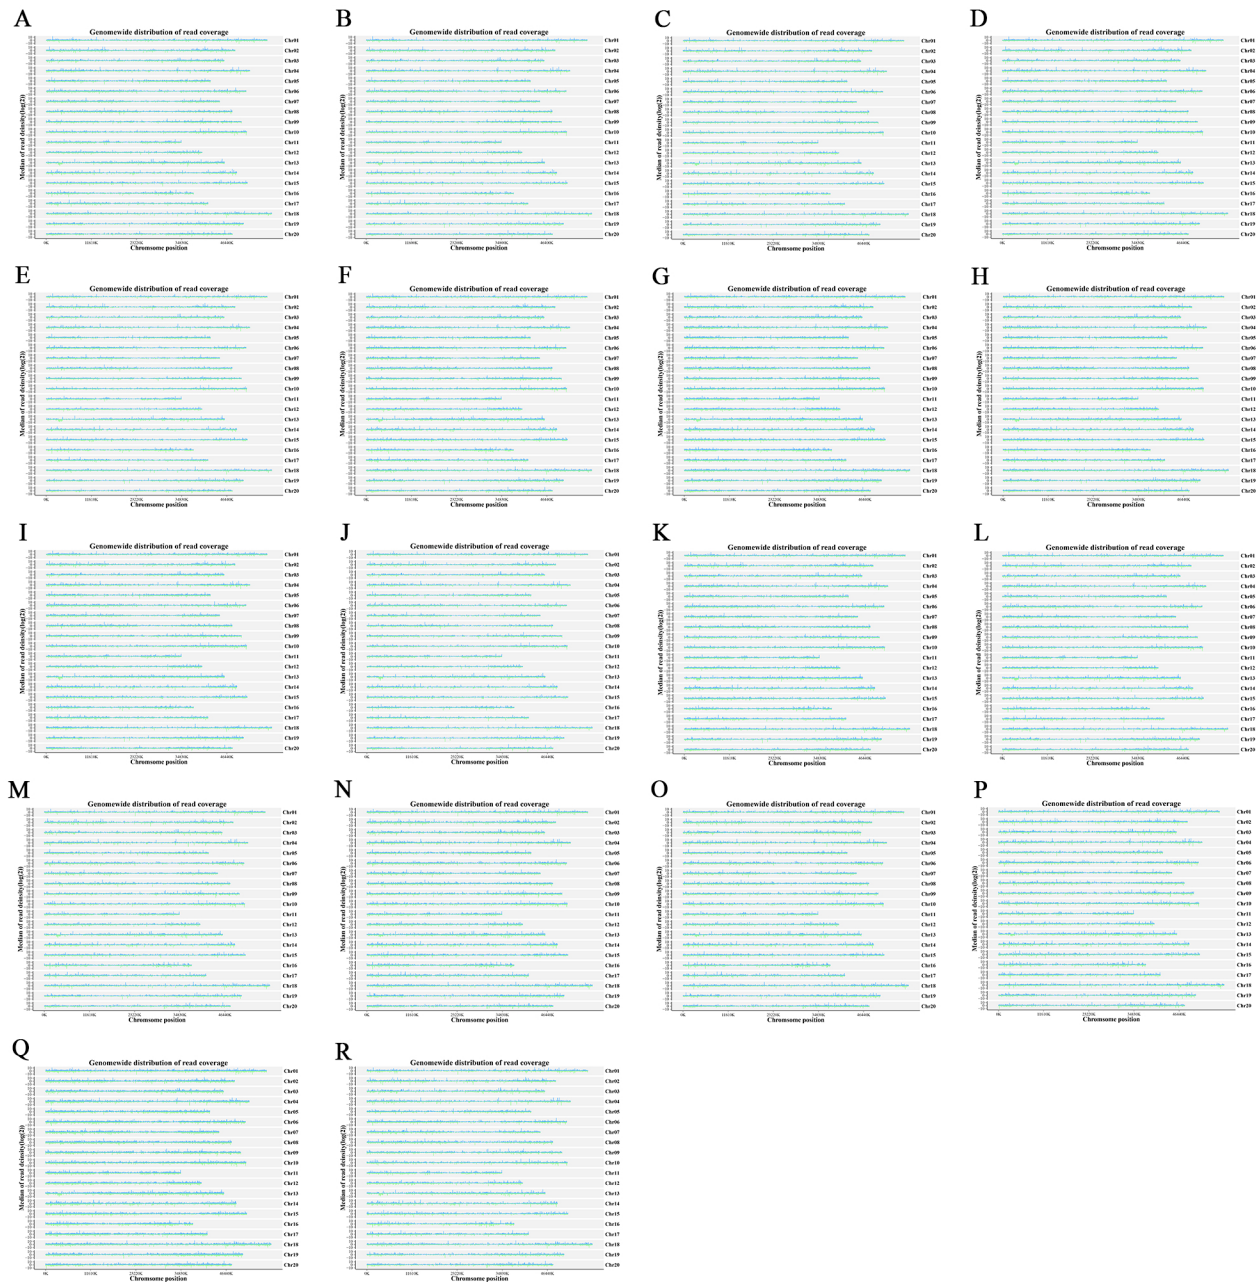

**Figure S2** The position and coverage depth distribution map of reads on the reference genome. A-R: Related information in 18 libraries from R-0-1 to S-14-3. The abscissa is the position of the chromosome; the ordinate is the logarithmic value of the coverage depth of the corresponding position on the chromosome with 2 as the base.
